# Supplementary material
Source: Springer Nature journal article supplement (https://www.springermedizin.de/resource/supplementary/12985_2007_357_MOESM4_ESM.pdf/9608058)

### A) Inhibition of HIV-1 binding

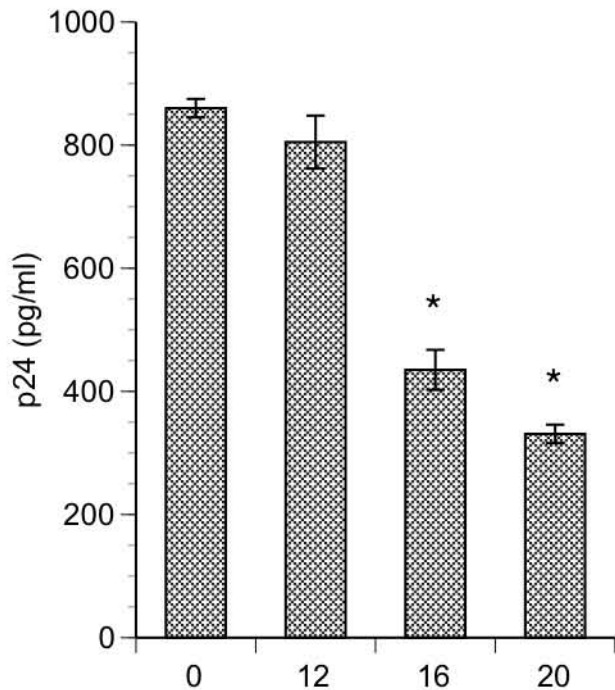

### B) Inhibition of HIV-1 replication

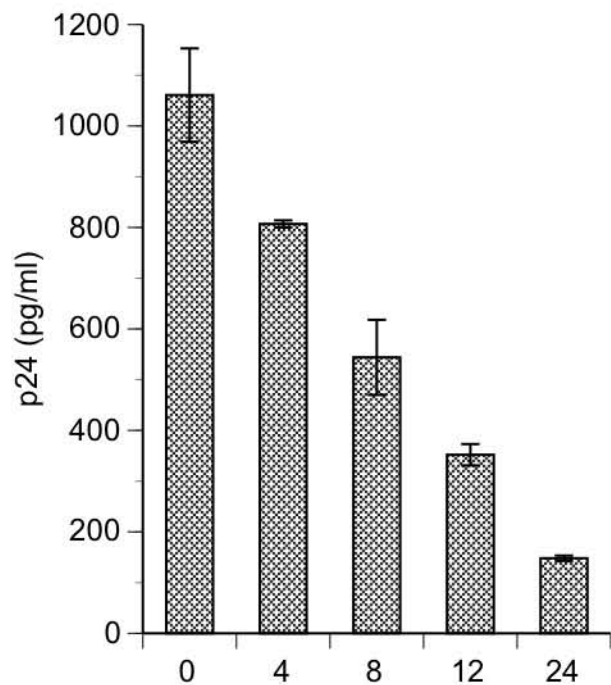

Treatment (SP4-2  $\mu\text{g/ml}$ )

Supplement: MOESM4 [file 9608058]
